# Supplementary material for: Covid-19-Schutzmaßnahmen und Einschränkungen des sozialen Lebens in Pflegeheimen
Source: Atypon-hosted journal article supplement (doi:10.1024/1012-5302/a000854), 2021-12-13

## **Legende Aufnahmestopp:**

Rot = Neuaufnahmen verboten

Gelb = Aufnahmen (wieder) erlaubt, unter Schutzmaßnahmen (z.T. nicht näher benannt, meist aber 14 Tage Quarantäne oder Teilnahme an der Gemeinschaft nur mit MNS oder Abstand)

Bsp. Niedersachsen: „Neuaufnahmen verboten, außer, wenn 14 Tage Quarantäne eingehalten werden können“ ist gelb kodiert

BL: Bundesländer

BE: Berlin

BR: Brandenburg

BW: Baden-Württemberg

BY: Bayern

HB: Bremen

HE: Hessen

HH: Hamburg

MV: Mecklenburg-Vorpommern

NI: Niedersachsen

NRW: Nordrhein-Westfalen

RP: Rheinland-Pfalz

SH: Schleswig-Holstein

SL: Saarland

SN: Sachsen

ST: Sachsen-Anhalt

TH: Thüringen

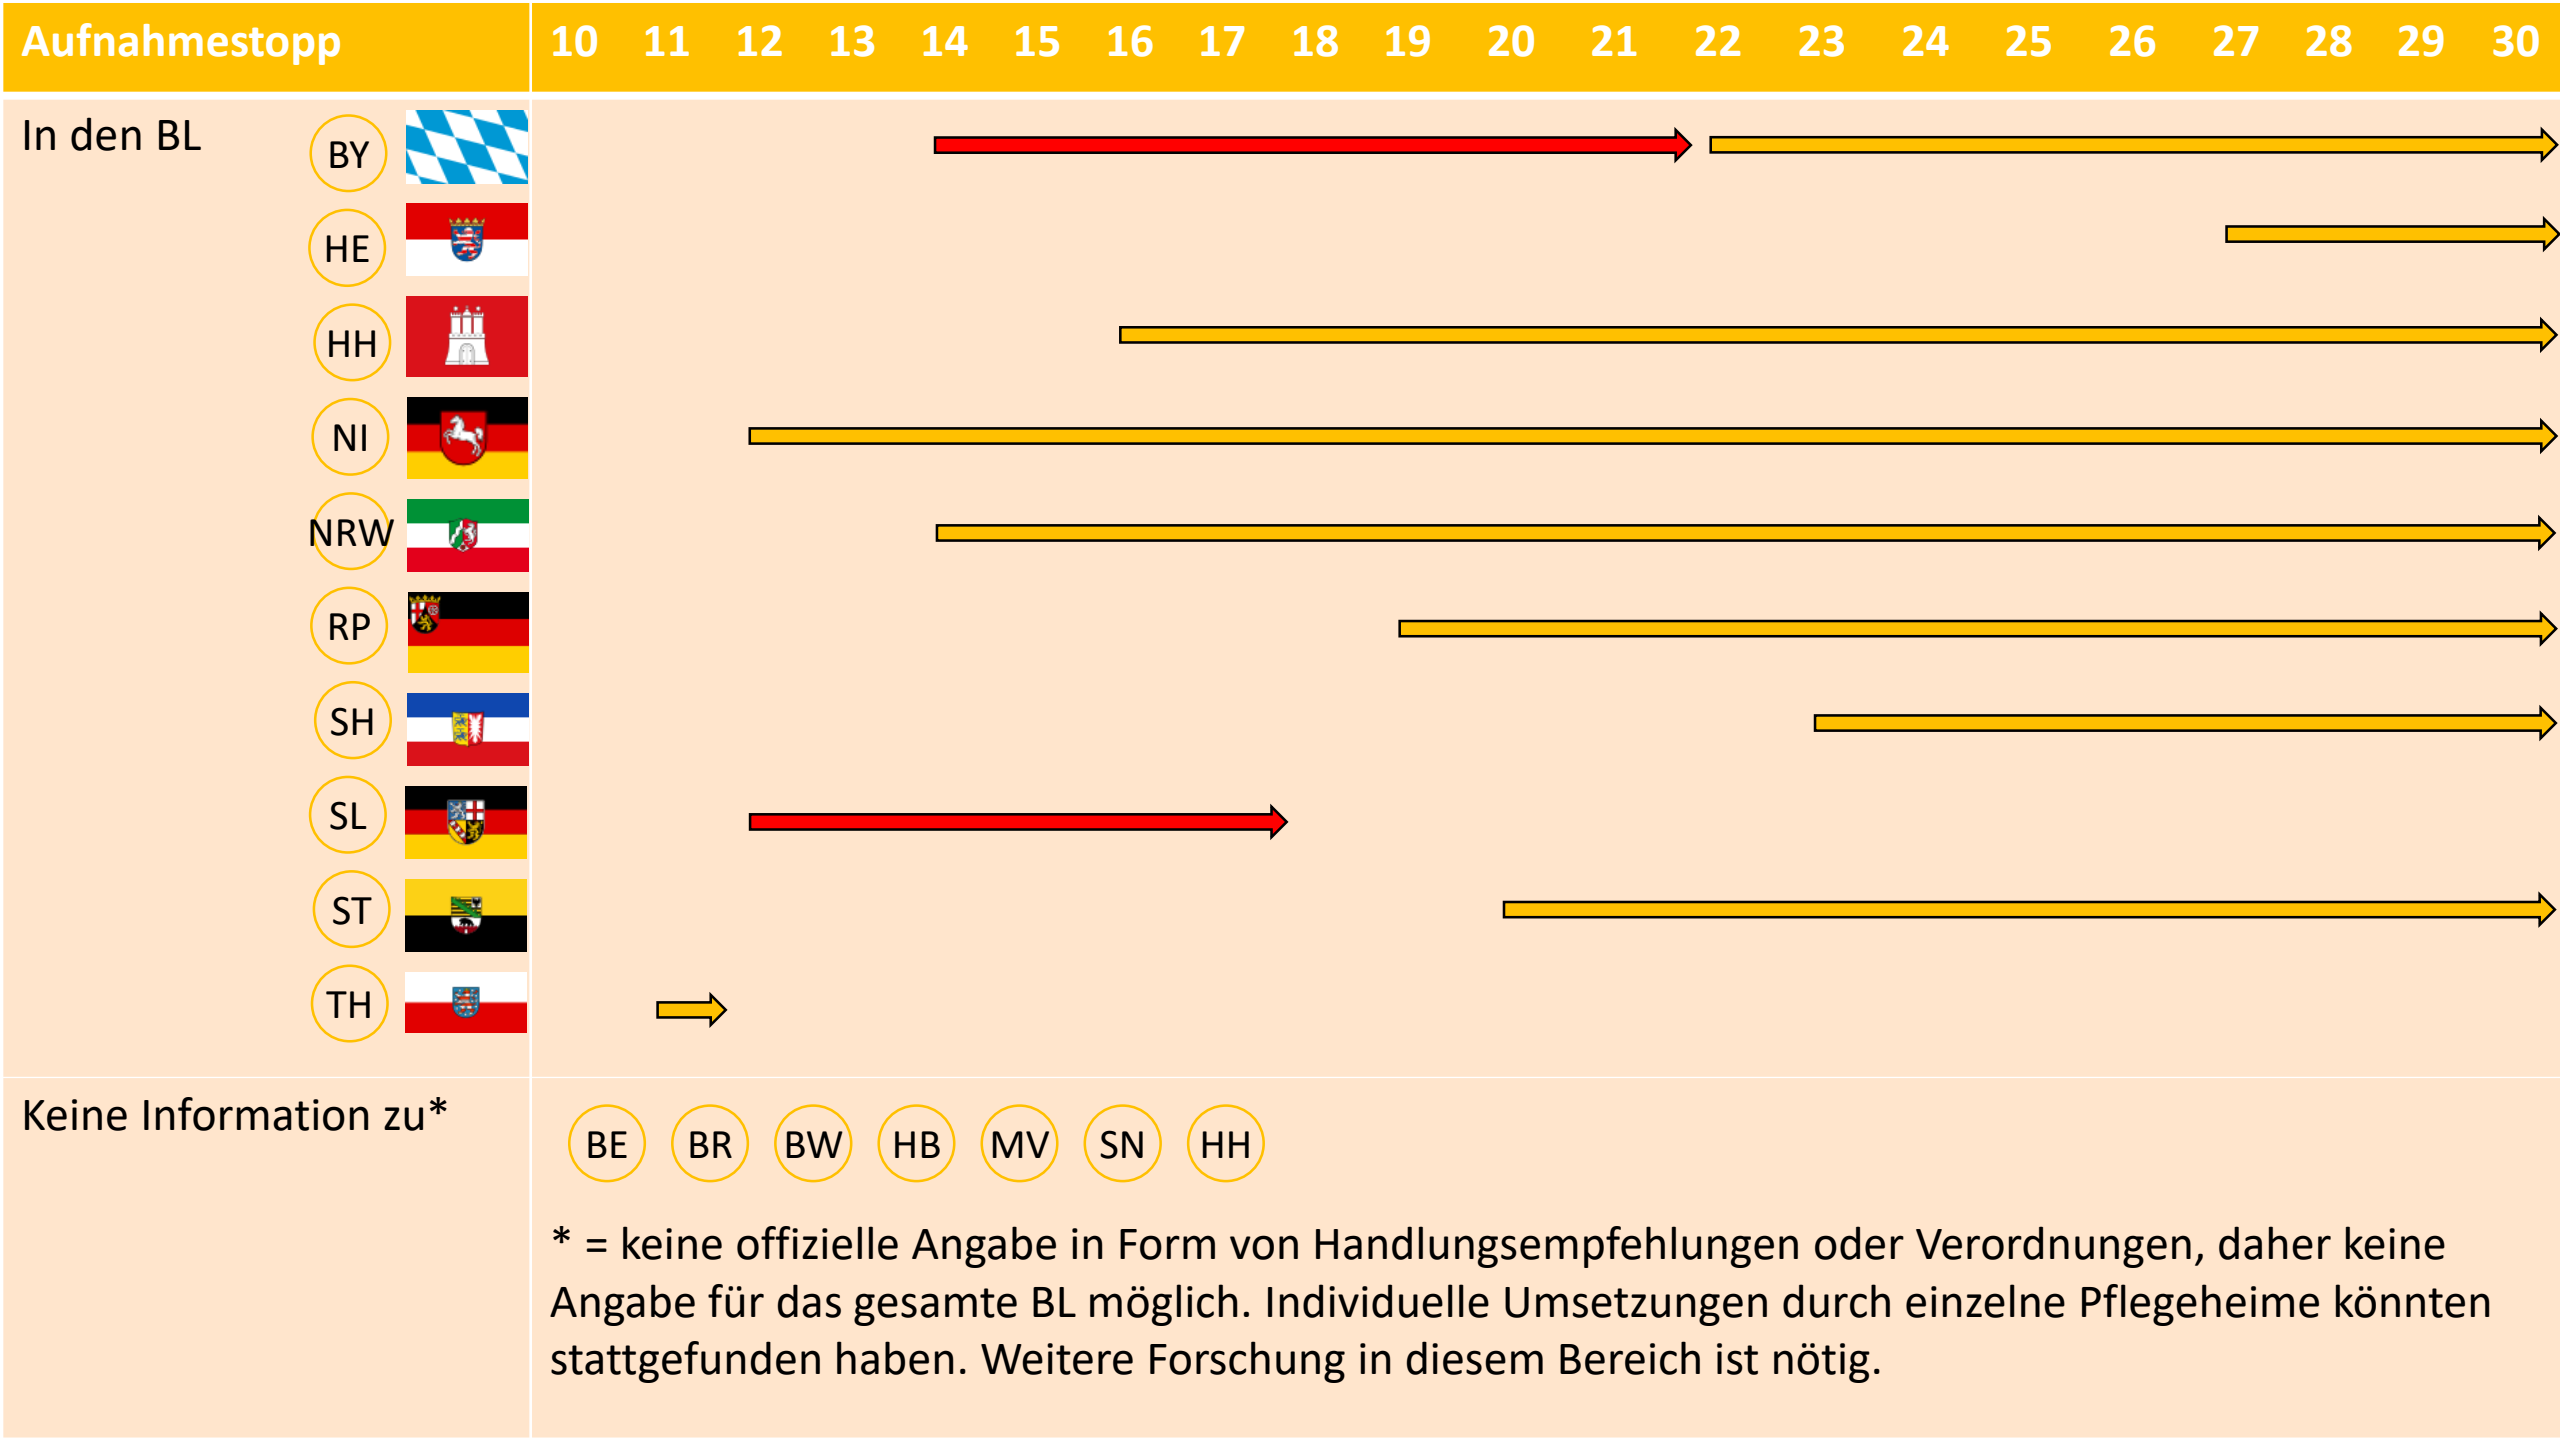

## **Legende Höchstarbeitszeit:**

Änderung der Höchstarbeitszeit auf bis zu 12 Std./Tag mit den gängigen Ruhepausen - Arbeitszeitgesetz

BL: Bundesländer

BE: Berlin

BR: Brandenburg

BW: Baden-Württemberg

BY: Bayern

HB: Bremen

HE: Hessen

HH: Hamburg

MV: Mecklenburg-Vorpommern

NI: Niedersachsen

NRW: Nordrhein-Westfalen

RP: Rheinland-Pfalz

SH: Schleswig-Holstein

SL: Saarland

SN: Sachsen

ST: Sachsen-Anhalt

TH: Thüringen

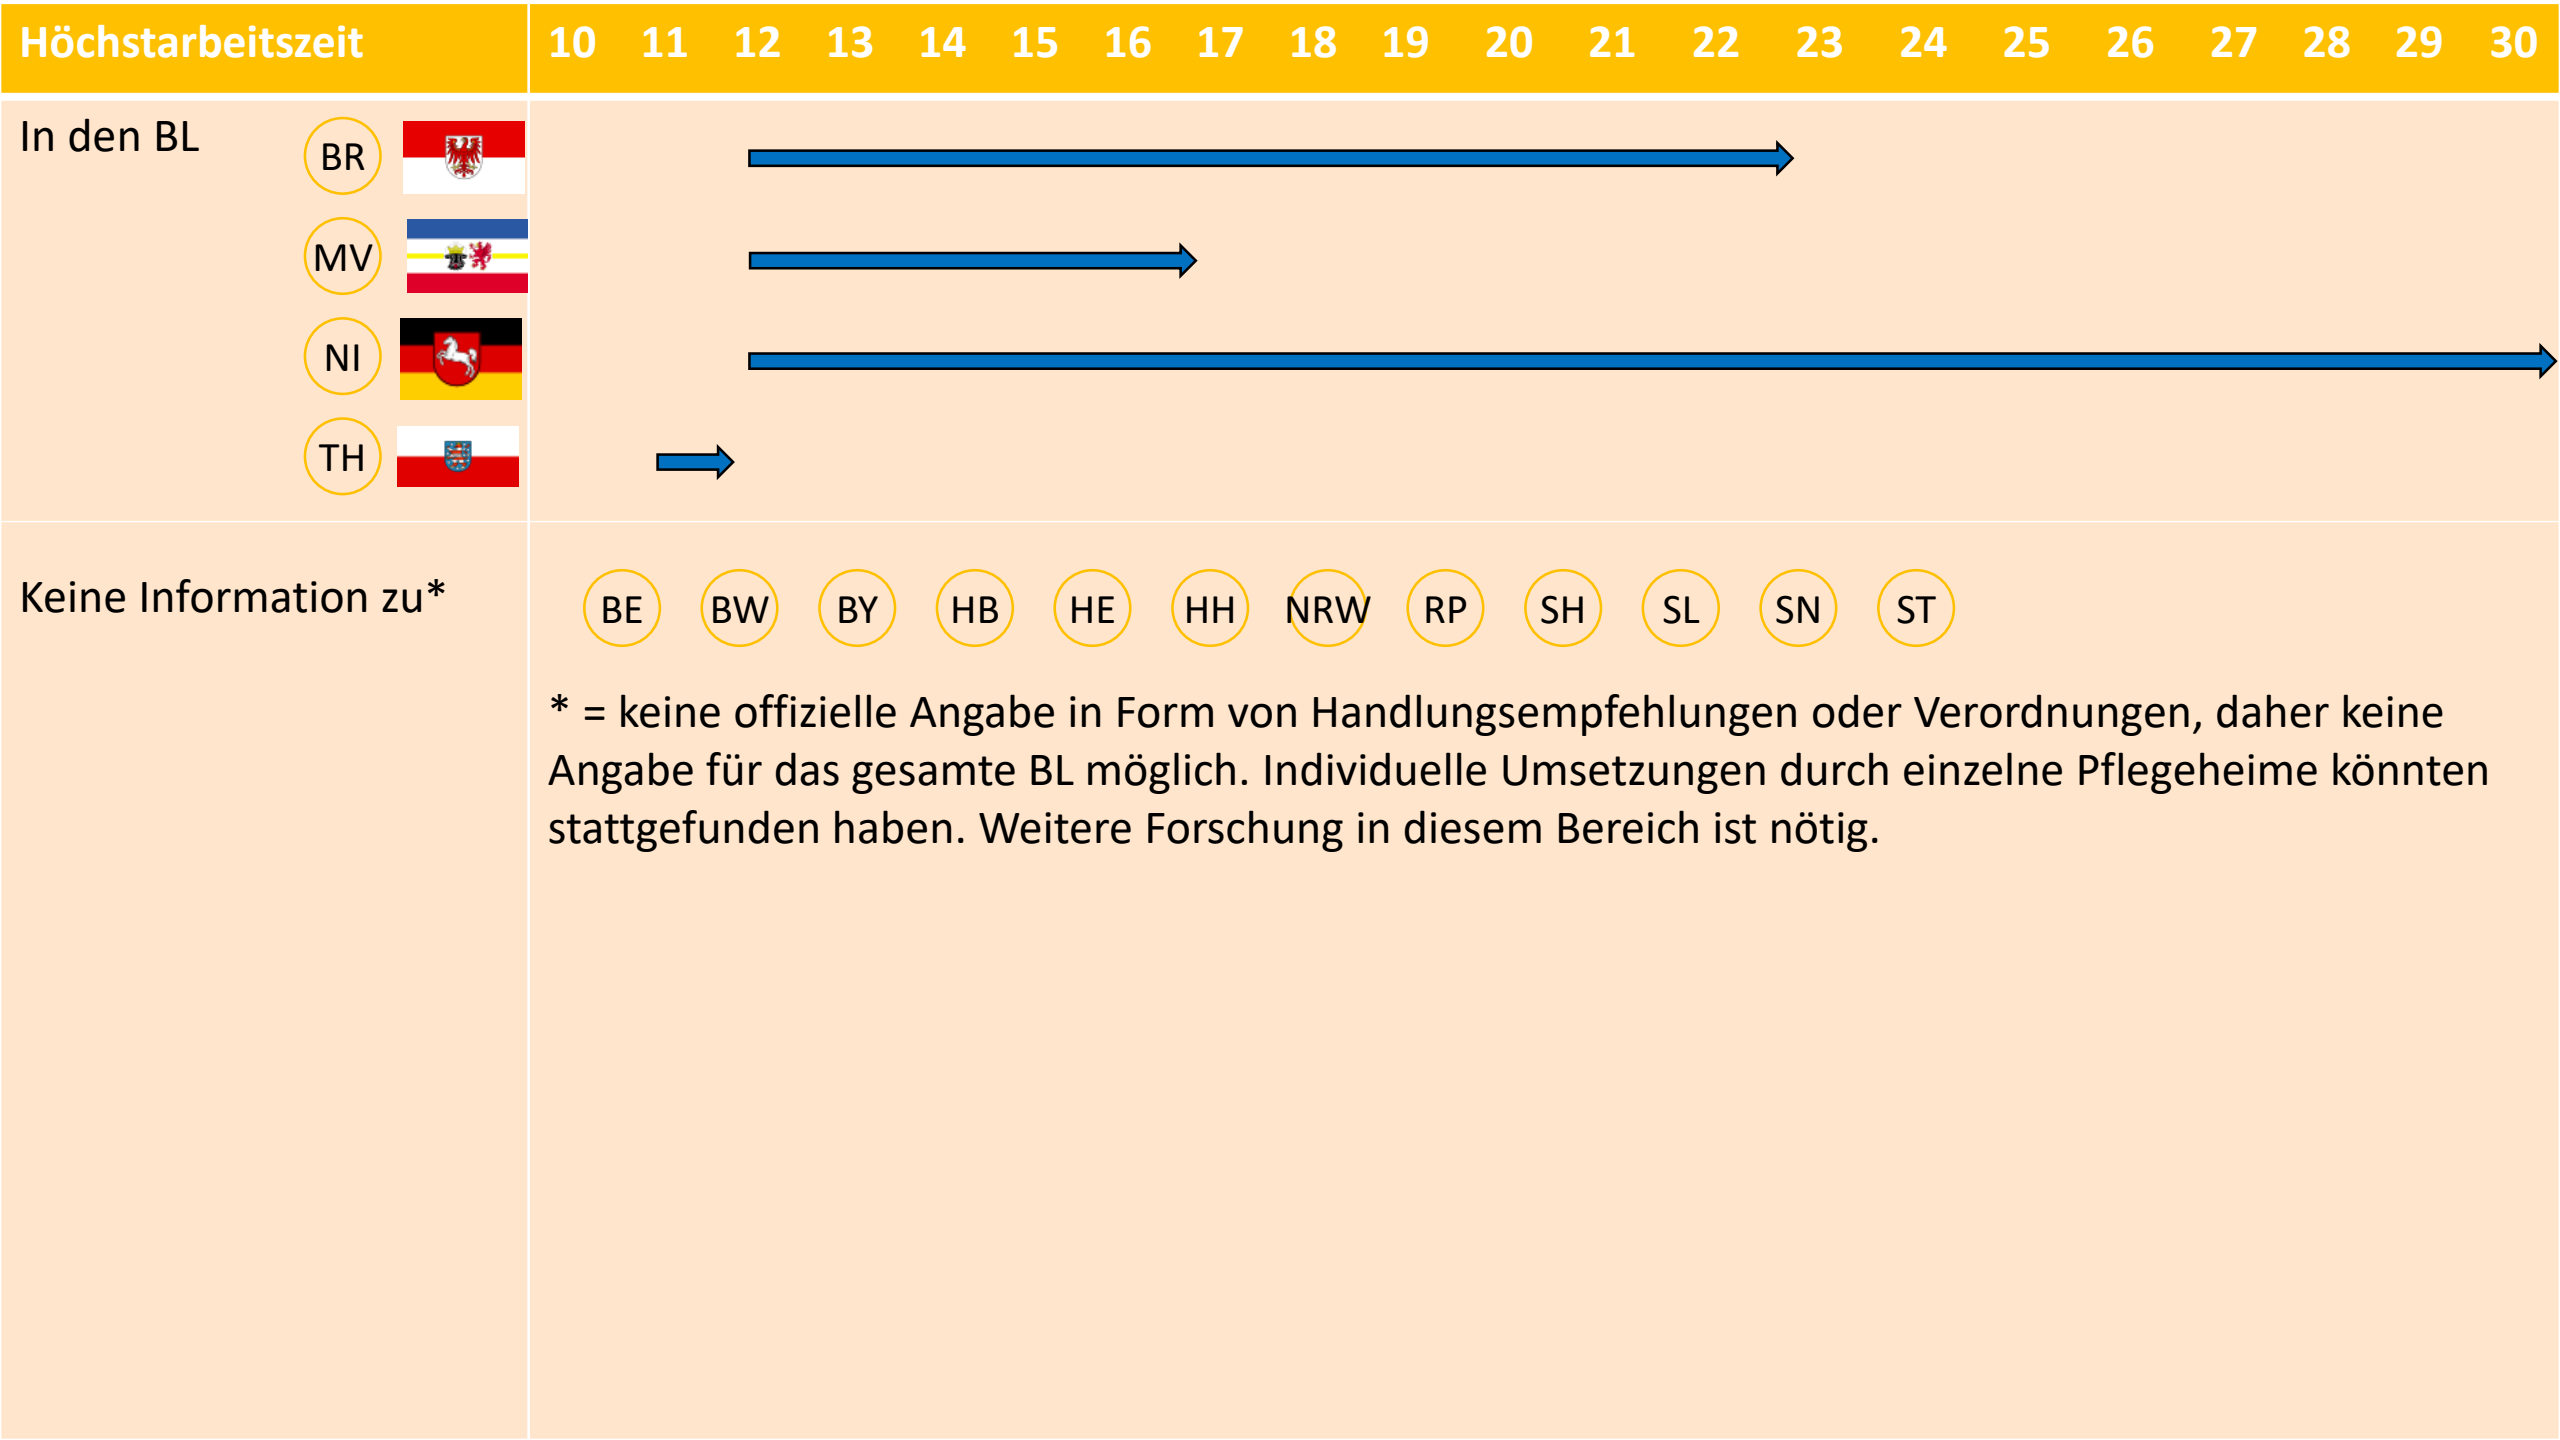

## **Legende Gruppenangebote:**

Rot = Verbote

Orange = strengere Einschränkungen (NI „Gruppenangebote stark einschränken“)

Gelb = Einschränkungen (NI „Gruppenangebote nur mit 1,5-2m Abstand“)

Grün = Gruppenangebote zugelassen

BL: Bundesländer

BE: Berlin

BR: Brandenburg

BW: Baden-Württemberg

BY: Bayern

HB: Bremen

HE: Hessen

HH: Hamburg

MV: Mecklenburg-Vorpommern

NI: Niedersachsen

NRW: Nordrhein-Westfalen

RP: Rheinland-Pfalz

SH: Schleswig-Holstein

SL: Saarland

SN: Sachsen

ST: Sachsen-Anhalt

TH: Thüringen

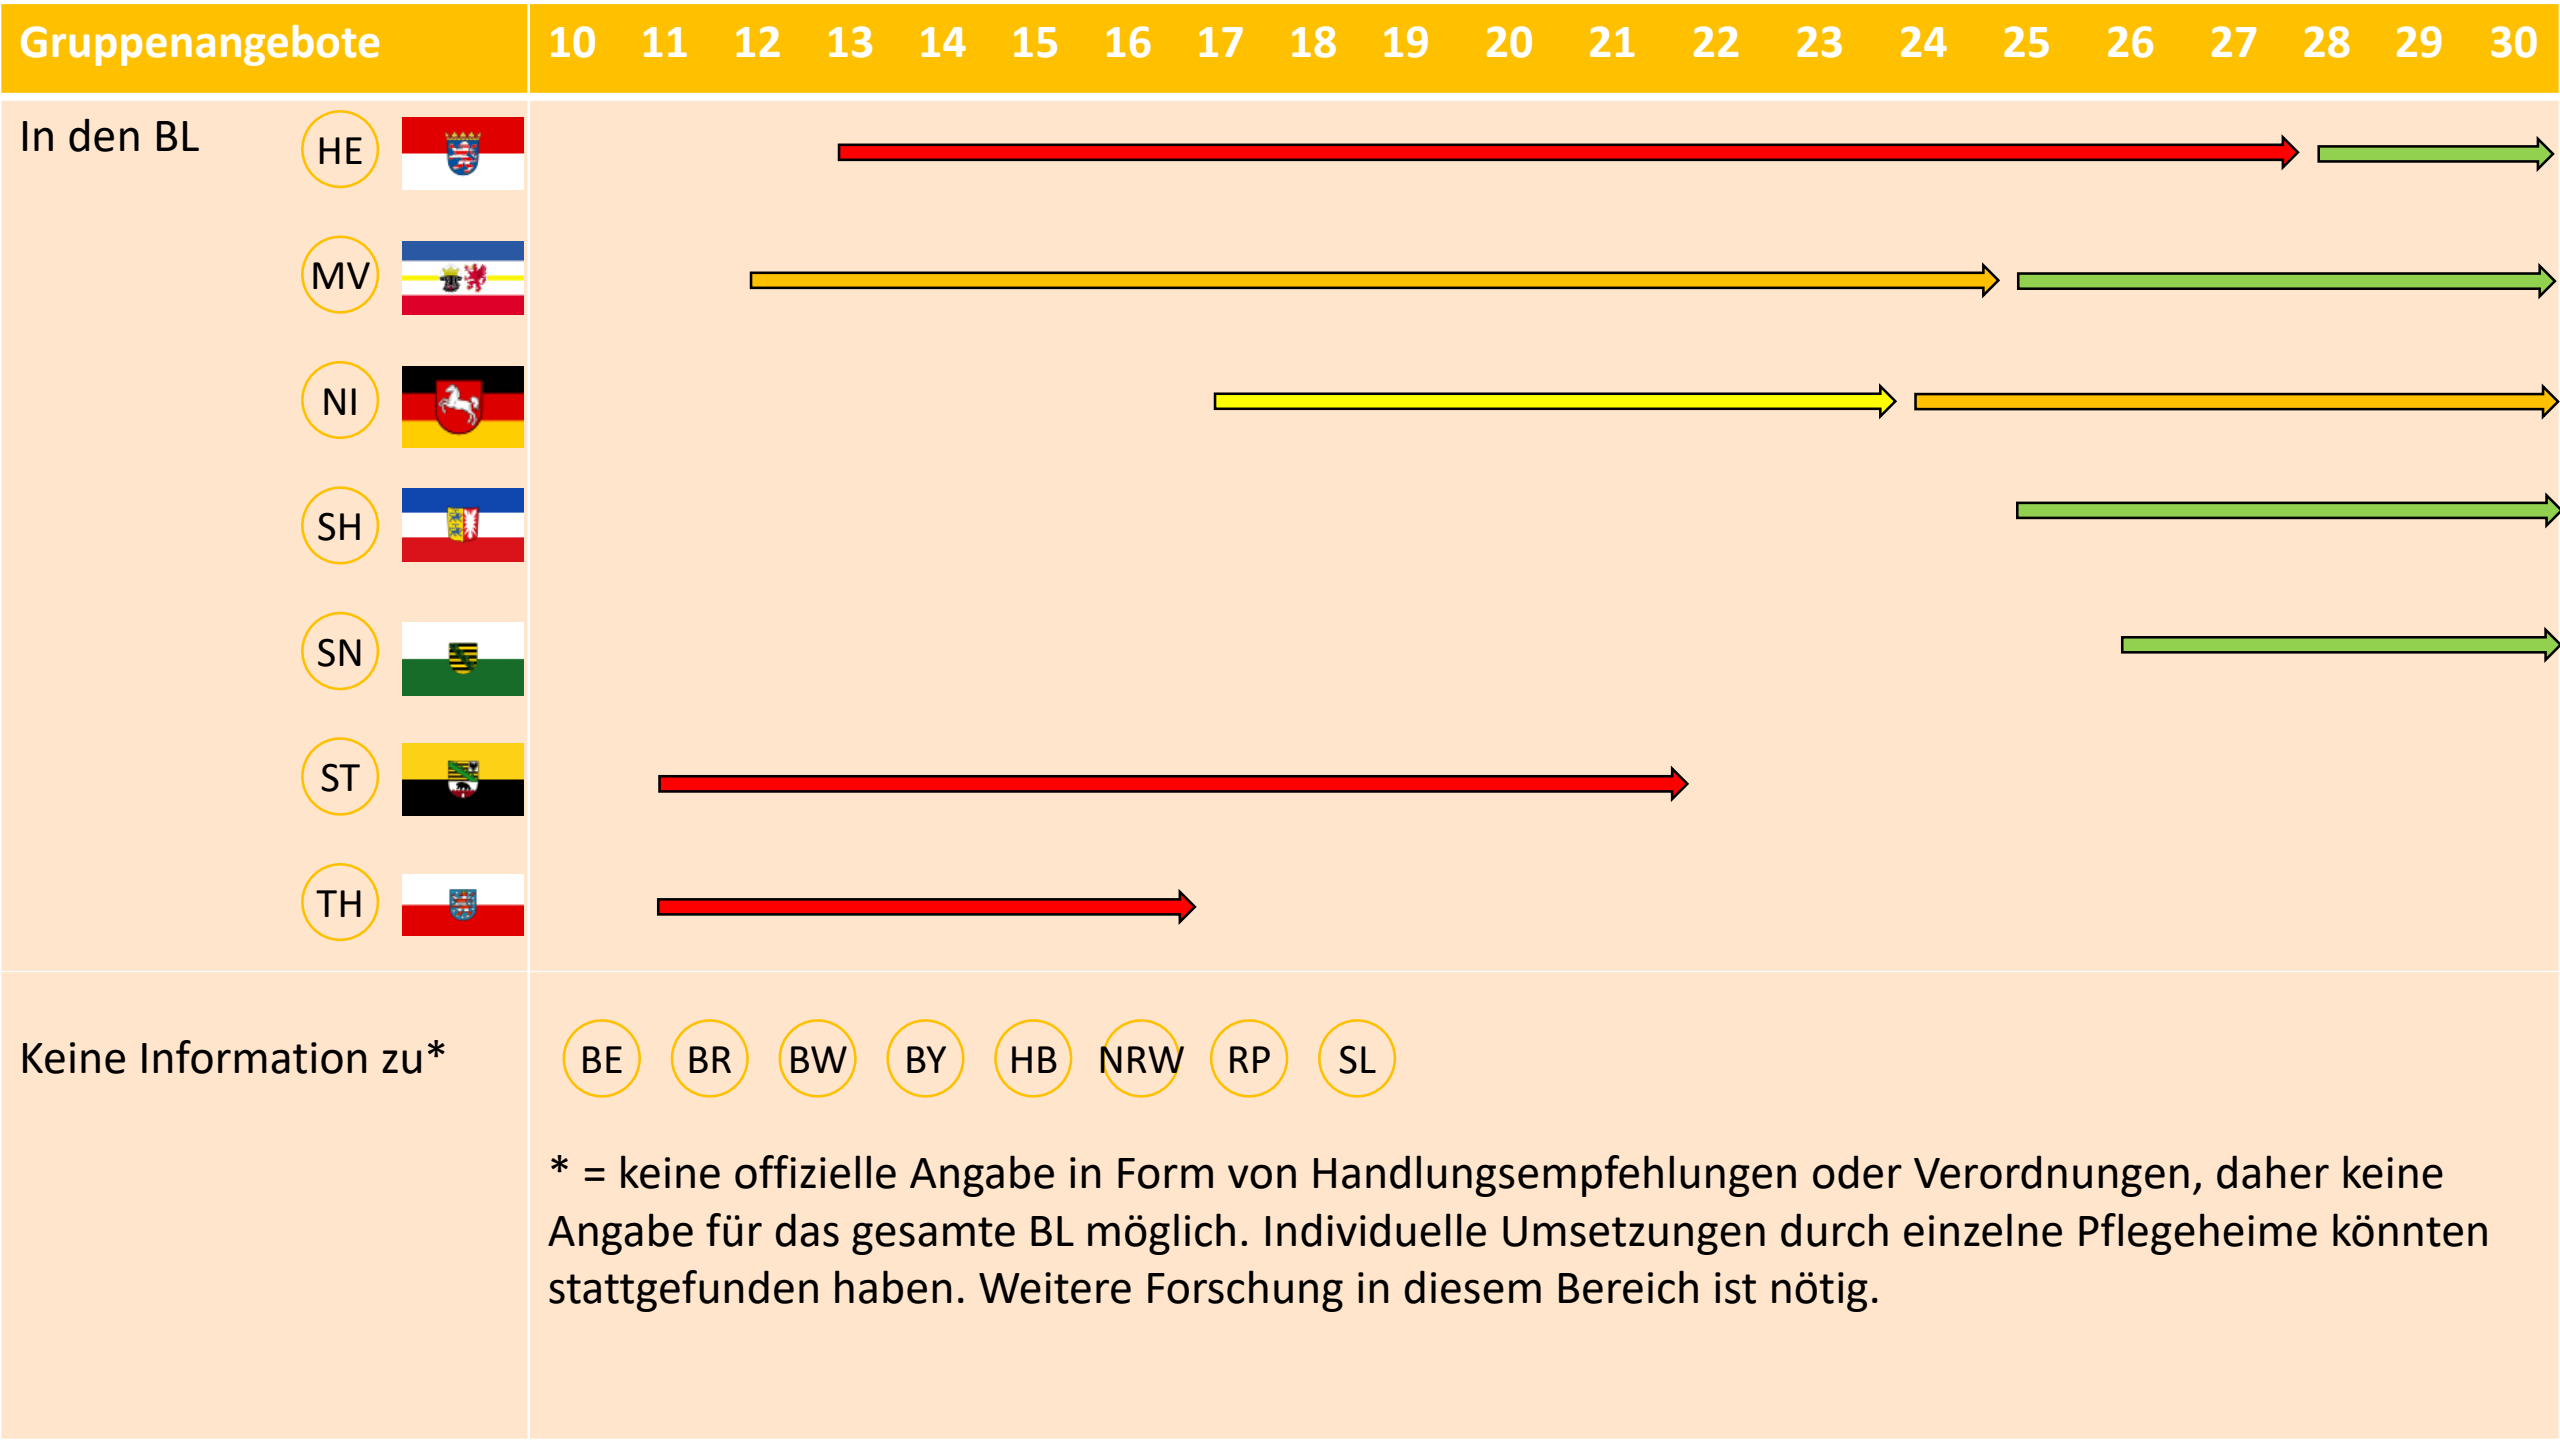

## **Legende Isolation:**

Blau = Isolation bei Neuaufnahme/Wiederaufnahme oder bei Symptomen, idR. 14 Tage (nicht abgetragen: Verbote von Neuaufnahmen)

BL: Bundesländer

BE: Berlin

BR: Brandenburg

BW: Baden-Württemberg

BY: Bayern

HB: Bremen

HE: Hessen

HH: Hamburg

MV: Mecklenburg-Vorpommern

NI: Niedersachsen

NRW: Nordrhein-Westfalen

RP: Rheinland-Pfalz

SH: Schleswig-Holstein

SL: Saarland

SN: Sachsen

ST: Sachsen-Anhalt

TH: Thüringen

Isolation

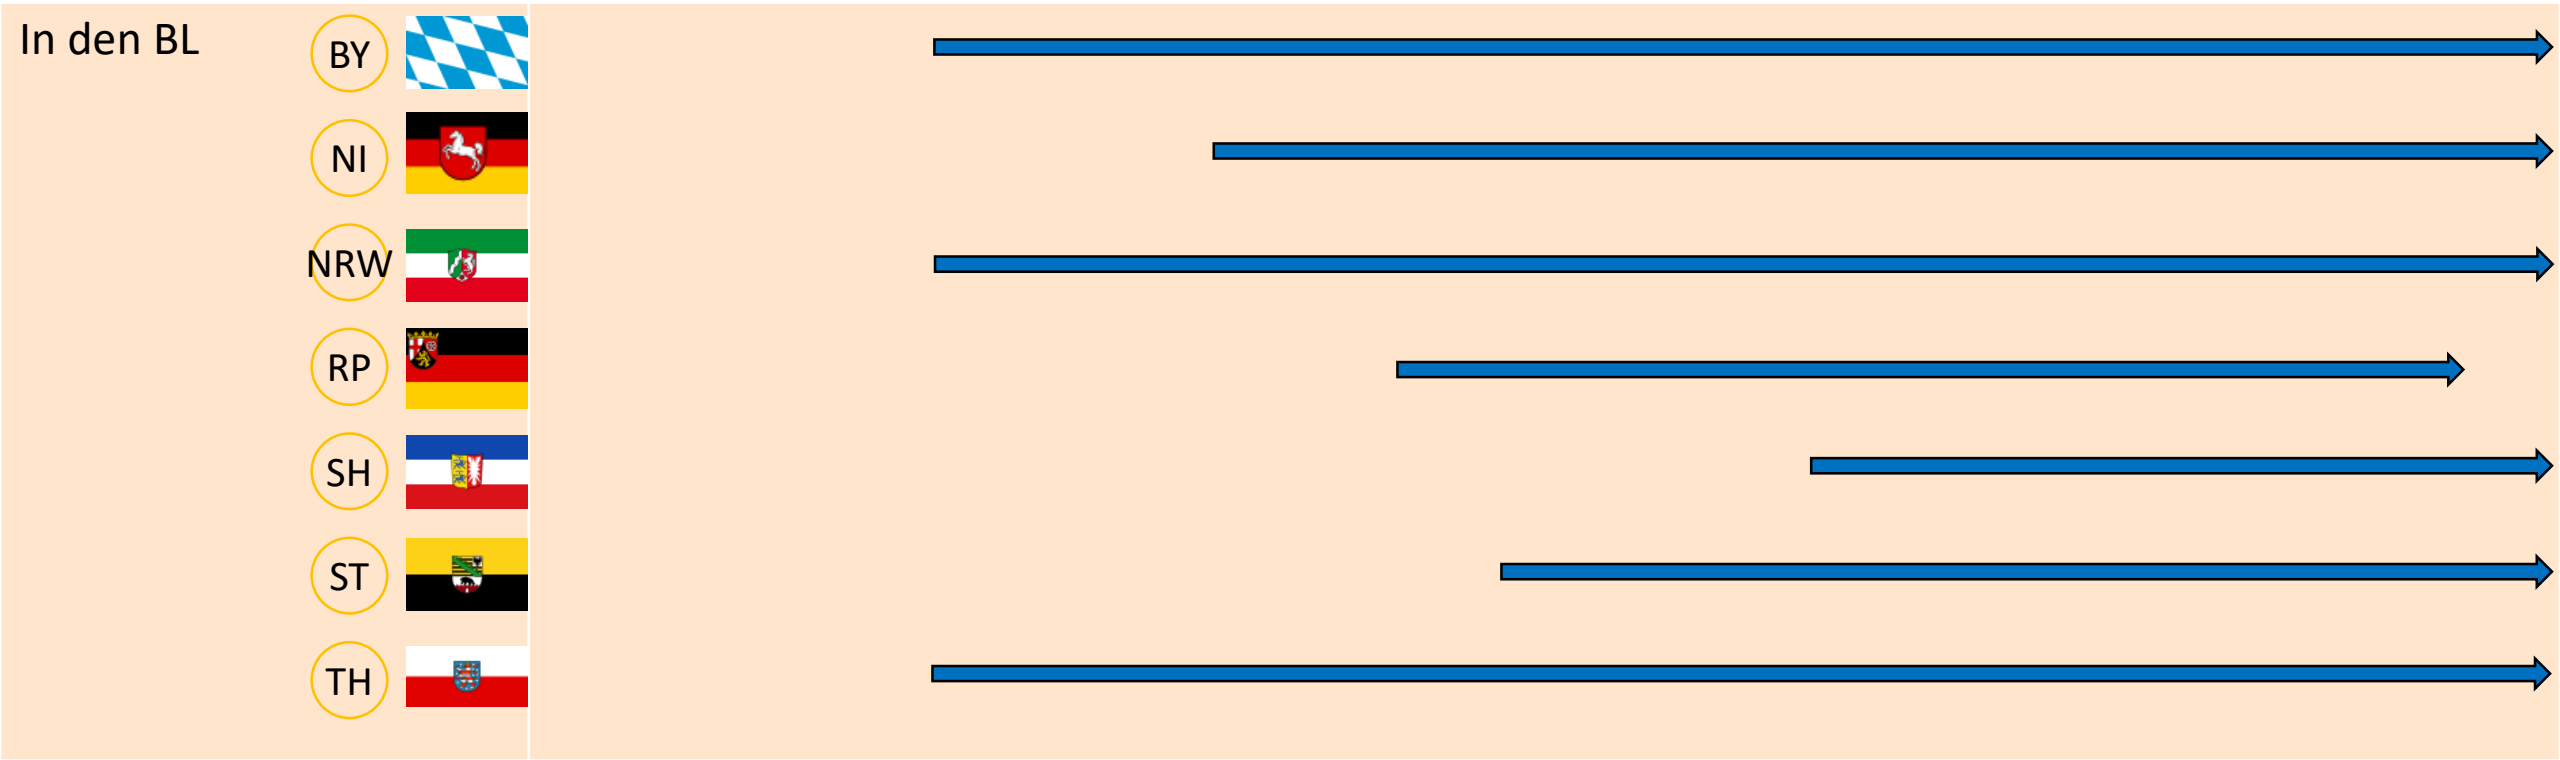

Keine Information zu\*

\* = keine offizielle Angabe in Form von Handlungsempfehlungen oder Verordnungen, daher keine Angabe für das gesamte BL möglich. Individuelle Umsetzungen durch einzelne Pflegeheime könnten stattgefunden haben. Weitere Forschung in diesem Bereich ist nötig.



## **Legende Kontaktreduzierung:**

Blau = Kohortisierung/Bezugspflege/Wohnbereiche/MNS Pflicht nach Ausgang/Reduktion Kontakte außerhalb

BL: Bundesländer

BE: Berlin

BR: Brandenburg

BW: Baden-Württemberg

BY: Bayern

HB: Bremen

HE: Hessen

HH: Hamburg

MV: Mecklenburg-Vorpommern

NI: Niedersachsen

NRW: Nordrhein-Westfalen

RP: Rheinland-Pfalz

SH: Schleswig-Holstein

SL: Saarland

SN: Sachsen

ST: Sachsen-Anhalt

TH: Thüringen

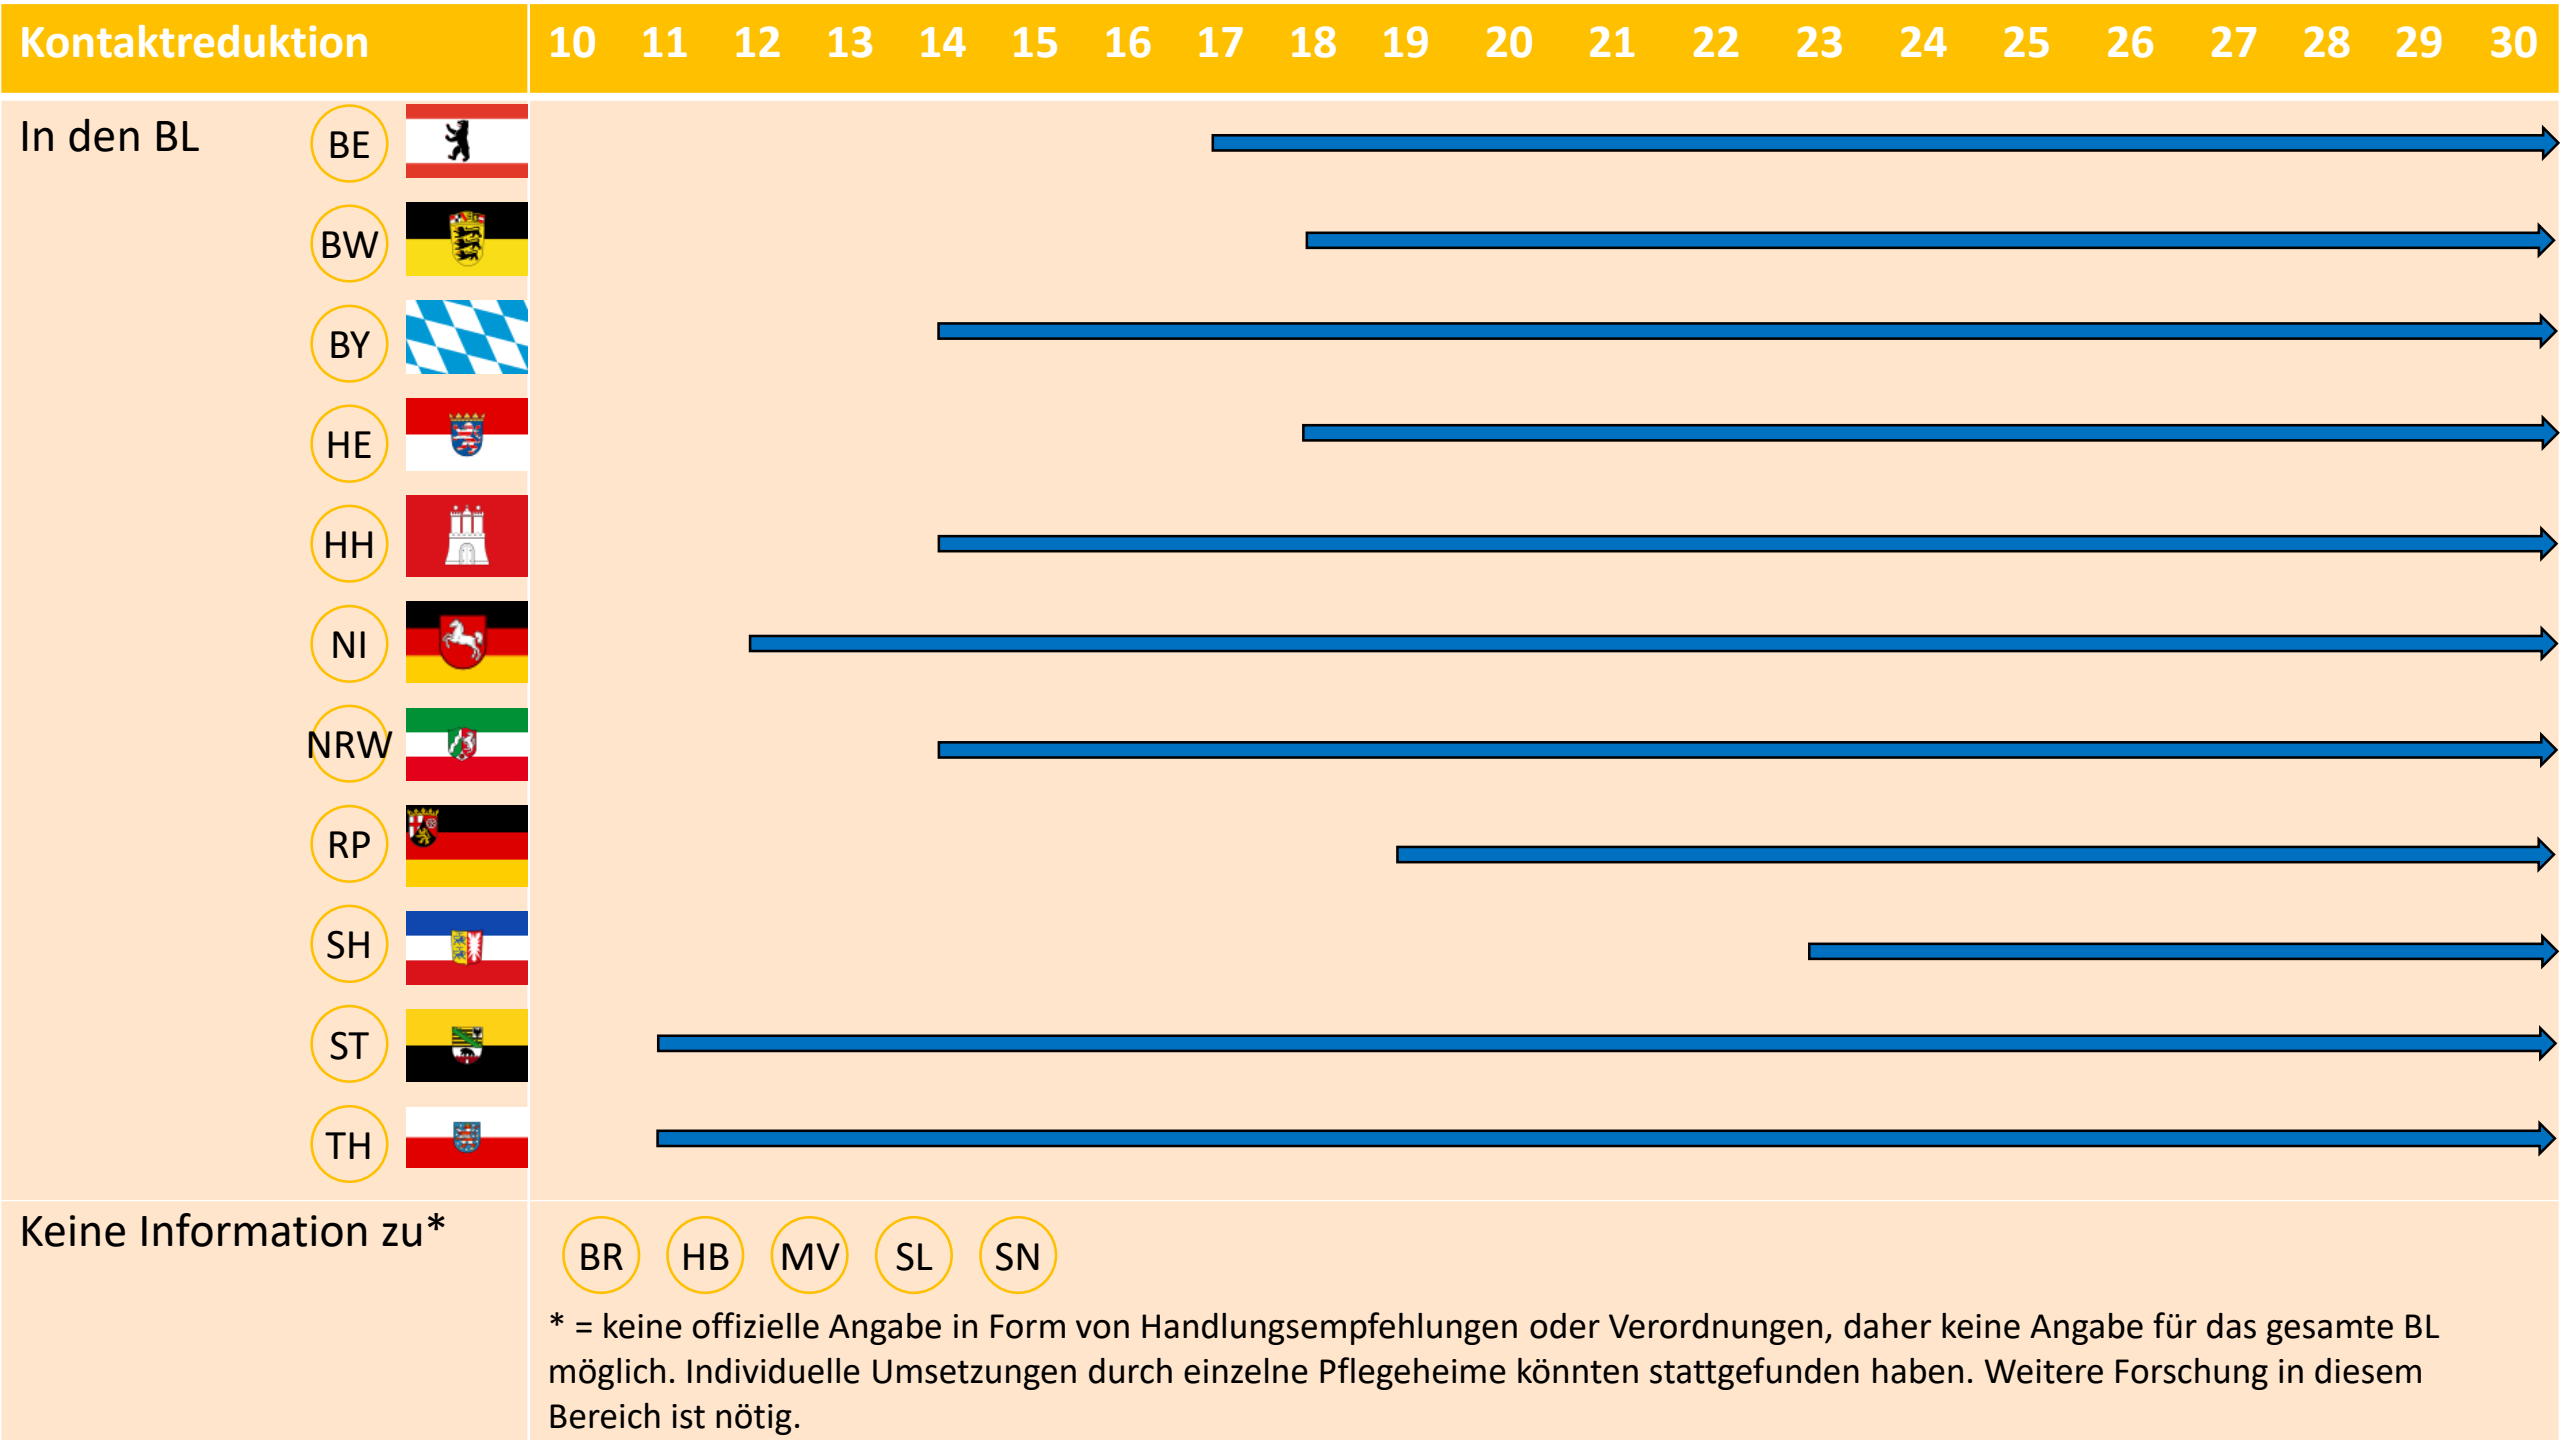

Supplement: 1012-5302_a000854_esm1.pdf [file 1012-5302_a000854_esm1.pdf]
